# Supplementary material for: Unraveling the Boredom Paradox: How Mindfulness and Wisdom Moderate Extraversion’s Impact
Source: Research Square preprint supplement (doi:10.21203/rs.3.rs-8120982/v1), 2025-11-28
Supplement: Supplementary file 1 [file 08980a2996e20cce7058a2b4.docx]

**Supplementary Tables**

| Study | Moderator | Dependent Variable | ΔR2 | f2 | N | Required N if | |
| --- | --- | --- | --- | --- | --- | --- | --- |
|  | Number of moderators = 1 | Number of moderators = 2 |
| Rosenstreich & Margalit (2015) | Loneliness × Mindfulness | Academic Achievement | 0.096 | 0.106 | 73 | 77 | 95 |
| Lu et al. (2025) | Extraversion × Mindfulness | Pain Adaptation | 0.275 | 0.379 | 52 | 23 | 29 |
| Fang et al. (2018) | Extraversion × Mindfulness | Sleep Quality | 0.038 | 0.04 | 172 | 201 | 247 |

Table S1. Studies used to estimate the required sample size

Table S2. Main and interaction effects between wisdom and extraversion in predicting boredom and its dimensions

| Dependent variable | *R* | *R2* | *MSE* | *F (HC0)* | *df1* | *df2* | *f2* | *p* |
| --- | --- | --- | --- | --- | --- | --- | --- | --- |
| Inattention | .49 | .24 | 32.21 | 25.97 | 3 | 200 | .32 | .000 |
| ***B*** | ***SE B (HC0)*** | ***t*** | ***p*** | ***ΔR2*** | ***Var f2*** |  |  |
| Constant | 15.09 | .40 | 38.05 | .000 |  |  |  |  |
| Extraversion | -.32 | .13 | -2.55 | .01 |  |  |  |  |
| Wisdom | -.65 | .08 | -7.84 | .000 |  |  |  |  |
| Extraversion × Wisdom | .03 | .03 | 1.01 | .314 | .003 | .003 |  |  |
| Dependent variable | ***R*** | ***R2*** | ***MSE*** | ***F (HC0)*** | ***df1*** | ***df2*** | ***f2*** | ***p*** |
| Disengagement | .48 | .23 | 168.34 | 23.59 | 3 | 200 | .29 | .000 |
|  | ***B*** | ***SE B (HC0)*** | ***t*** | ***p*** | ***ΔR2*** | ***Var f2*** |  |  |
| Constant | 38.52 | .91 | 42.20 | .000 |  |  |  |  |
| Extraversion | -.95 | .27 | -3.48 | .001 |  |  |  |  |
| Wisdom | -1.36 | .19 | -6.98 | .000 |  |  |  |  |
| Extraversion × Wisdom | -.08 | .06 | -1.22 | .225 | .005 | .005 |  |  |
| Dependent variable | ***R*** | ***R2*** | ***MSE*** | ***F (HC0)*** | ***df1*** | ***df2*** | ***f2*** | ***p*** |
| High arousal | .53 | .28 | 41.91 | 33.40 | 3 | 200 | .30 | .000 |
|  | ***B*** | ***SE B (HC0)*** | ***t*** | ***p*** | ***ΔR2*** | ***Var f2*** |  |  |
| Constant | 17.94 | .47 | 38.58 | .000 |  |  |  |  |
| Extraversion | -.57 | .14 | -4.05 | .000 |  |  |  |  |
| Wisdom | -.76 | .10 | -7.73 | .000 |  |  |  |  |
| Extraversion × Wisdom | -.02 | .03 | -.69 | .494 | .002 | .002 |  |  |
| Dependent variable | ***R*** | ***R2*** | ***MSE*** | ***F (HC0)*** | ***df1*** | ***df2*** | ***f2*** | ***p*** |
| Low arousal | .56 | .32 | 53.61 | 41.60 | 3 | 200 | .47 | .000 |
|  | ***B*** | ***SE B (HC0)*** | ***t*** | ***p*** | ***ΔR2*** | ***Var f2*** |  |  |
| Constant | 16.85 | .52 | 32.12 | .000 |  |  |  |  |
| Extraversion | -.87 | .16 | -5.46 | .000 |  |  |  |  |
| Wisdom | -.85 | .11 | -7.99 | .000 |  |  |  |  |
| Extraversion × Wisdom | -.03 | .04 | -.98 | .328 | .003 | .003 |  |  |
| Dependent variable | ***R*** | ***R2*** | ***MSE*** | ***F (HC0)*** | ***df1*** | ***df2*** | ***f2*** | ***p*** |
| Time perception | .30 | .09 | 49.68 | 7.49 | 3 | 200 | .09 | .000 |
|  | ***B*** | ***SE B (HC0)*** | ***t*** | ***p*** | ***ΔR2*** | ***Var f2*** |  |  |
| Constant | 13.37 | .50 | 26.62 | .000 |  |  |  |  |
| Extraversion | -.45 | .15 | -3.08 | .002 |  |  |  |  |
| Wisdom | -.32 | .12 | -2.76 | .006 |  |  |  |  |
| Extraversion × Wisdom | .00 | .03 | .00 | .999 | .000 | .000 |  |  |
| Dependent variable | ***R*** | ***R2*** | ***MSE*** | ***F (HC0)*** | ***df1*** | ***df2*** | ***f2*** | ***p*** |
| Boredom | .54 | .29 | 1119.7 | 34.60 | 3 | 200 | .41 | .000 |
|  | ***B*** | ***SE B (HC0)*** | ***t*** | ***p*** | ***ΔR2*** | ***Var f2*** |  |  |
| Constant | 101.77 | 2.37 | 42.89 | .000 |  |  |  |  |
| Extraversion | -3.16 | .70 | -4.49 | .000 |  |  |  |  |
| Wisdom | -3.94 | .49 | -7.96 | .000 |  |  |  |  |
| Extraversion × Wisdom | -.11 | .16 | -.69 | .49 | .001 | .001 |  |  |

Table S3. Main and interaction effects between mindfulness and extraversion in predicting boredom and its dimensions

| Dependent variable | *R* | *R2* | *MSE* | *F (HC0)* | *df1* | *df2* | *f2* | *p* |
| --- | --- | --- | --- | --- | --- | --- | --- | --- |
| Disengagement | .29 | .08 | 201.69 | 6.99 | 3 | 200 | .08 | .000 |
| ***B*** | ***SE B (HC0)*** | ***t*** | ***p*** | ***ΔR2*** | ***Var f2*** |  |  |
| Constant | 38.22 | 1.02 | 37.49 | .000 |  |  |  |  |
| Extraversion | -1.16 | .32 | -3.65 | .000 |  |  |  |  |
| Mindfulness | -.06 | .06 | -1.06 | .291 |  |  |  |  |
| Extraversion × Mindfulness | .01 | .02 | .36 | .722 | .001 | .001 |  |  |
| Dependent variable | ***R*** | ***R2*** | ***MSE*** | ***F (HC0)*** | ***df1*** | ***df2*** | ***f2*** | ***p*** |
| Inattention | .35 | .13 | 37.12 | 7.11 | 3 | 200 | .15 | .000 |
|  | ***B*** | ***SE B (HC0)*** | ***t*** | ***p*** | ***ΔR2*** | ***Var f2*** |  |  |
| Constant | 15.07 | .44 | 34.02 | .000 |  |  |  |  |
| Extraversion | -.36 | .14 | -2.51 | .013 |  |  |  |  |
| Mindfulness | -.07 | .03 | -2.38 | .018 |  |  |  |  |
| Extraversion × Mindfulness | .01 | .01 | .62 | .538 | .003 | .003 |  |  |
| Dependent variable | ***R*** | ***R2*** | ***MSE*** | ***F (HC0)*** | ***df1*** | ***df2*** | ***f2*** | ***p*** |
| High arousal | .35 | .12 | 51.25 | 9.66 | 3 | 200 | .14 | .000 |
|  | ***B*** | ***SE B (HC0)*** | ***t*** | ***p*** | ***ΔR2*** | ***Var f2*** |  |  |
| Constant | 17.81 | .51 | 34.79 | .000 |  |  |  |  |
| Extraversion | -.65 | .17 | -3.96 | .000 |  |  |  |  |
| Mindfulness | -.05 | .03 | -1.74 | .084 |  |  |  |  |
| Extraversion × Mindfulness | .00 | .01 | .49 | .624 | .002 | .002 |  |  |
| Dependent variable | ***R*** | ***R2*** | ***MSE*** | ***F (HC0)*** | ***df1*** | ***df2*** | ***f2*** | ***p*** |
| Low arousal | .40 | .16 | 65.77 | 15.22 | 3 | 200 | .19 | .000 |
|  | ***B*** | ***SE B (HC0)*** | ***t*** | ***p*** | ***ΔR2*** | ***Var f2*** |  |  |
| Constant | 16.66 | .59 | 28.13 | .000 |  |  |  |  |
| Extraversion | -.97 | .18 | -5.27 | .000 |  |  |  |  |
| Mindfulness | -.05 | .03 | -1.55 | .122 |  |  |  |  |
| Extraversion × Mindfulness | .01 | .01 | .68 | .498 | .002 | .002 |  |  |
| Dependent variable | ***R*** | ***R2*** | ***MSE*** | ***F (HC0)*** | ***df1*** | ***df2*** | ***f2*** | ***p*** |
| Time perception | .25 | .06 | 51.12 | 5.16 | 3 | 200 | .06 | .002 |
|  | ***B*** | ***SE B (HC0)*** | ***t*** | ***p*** | ***ΔR2*** | ***Var f2*** |  |  |
| Constant | 13.19 | .51 | 25.86 | .000 |  |  |  |  |
| Extraversion | -.49 | .16 | -3.15 | .002 |  |  |  |  |
| Mindfulness | -.01 | .03 | -.26 | .793 |  |  |  |  |
| Extraversion × Mindfulness | .01 | .01 | 1.20 | .230 | .01 | .01 |  |  |
| Dependent variable | ***R*** | ***R2*** | ***MSE*** | ***F (HC0)*** | ***df1*** | ***df2*** | ***f2*** | ***p*** |
| Boredom | .36 | .13 | 1375.8 | 10.95 | 3 | 200 | .15 | .000 |
|  | ***B*** | ***SE B (HC0)*** | ***t*** | ***p*** | ***ΔR2*** | ***Var f2*** |  |  |
| Constant | 100.97 | 2.66 | 38.02 | .000 |  |  |  |  |
| Extraversion | -3.63 | .83 | -4.36 | .000 |  |  |  |  |
| Mindfulness | -.25 | .17 | -1.45 | .150 |  |  |  |  |
| Extraversion × Mindfulness | .03 | .05 | .68 | .498 | .003 | .003 |  |  |

Table S4. Main and interaction effects between observing and extraversion in predicting boredom and its dimensions

| Dependent variable | *R* | *R2* | *MSE* | *F (HC0)* | *df1* | *df2* | *f2* | *p* |
| --- | --- | --- | --- | --- | --- | --- | --- | --- |
| Disengagement | .28 | .08 | 202.73 | 6.53 | 3 | 200 | .08 | .000 |
| ***B*** | ***SE B (HC0)*** | ***t*** | ***p*** | ***ΔR2*** | ***Var f2*** |  |  |
| Constant | 38.48 | 1.01 | 38.23 | .000 |  |  |  |  |
| Extraversion | -1.28 | .32 | -4.02 | .000 |  |  |  |  |
| Observing | -.16 | .21 | -.77 | .445 |  |  |  |  |
| Extraversion × Observing | -.05 | .07 | -.80 | .427 | .002 | .002 |  |  |
| Dependent variable | ***R*** | ***R2*** | ***MSE*** | ***F (HC0)*** | ***df1*** | ***df2*** | ***f2*** | ***p*** |
| Inattention | .27 | .08 | 39.28 | 5.70 | 3 | 200 | .001 | .004 |
|  | ***B*** | ***SE B (HC0)*** | ***t*** | ***p*** | ***ΔR2*** | ***Var f2*** |  |  |
| Constant | 15.29 | .44 | 34.40 | .000 |  |  |  |  |
| Extraversion | -.50 | .14 | -3.46 | .001 |  |  |  |  |
| Observing | -.13 | .10 | -1.3 | .193 |  |  |  |  |
| Extraversion × Observing | -.04 | .03 | -1.30 | .198 | .008 | .008 |  |  |
| Dependent variable | ***R*** | ***R2*** | ***MSE*** | ***F (HC0)*** | ***df1*** | ***df2*** | ***f2*** | ***p*** |
| High arousal | .32 | .10 | 52.35 | 8.17 | 3 | 200 | .11 | .000 |
|  | ***B*** | ***SE B (HC0)*** | ***t*** | ***p*** | ***ΔR2*** | ***Var f2*** |  |  |
| Constant | 17.96 | .51 | 35.53 | .000 |  |  |  |  |
| Extraversion | -.75 | .16 | -4.54 | .000 |  |  |  |  |
| Observing | -.12 | .11 | -1.12 | .265 |  |  |  |  |
| Extraversion × Observing | -.03 | .04 | -.77 | .445 | .002 | .002 |  |  |
| Dependent variable | ***R*** | ***R2*** | ***MSE*** | ***F (HC0)*** | ***df1*** | ***df2*** | ***f2*** | ***p*** |
| Low arousal | .39 | .15 | 66.37 | 14.43 | 3 | 200 | .18 | .000 |
|  | ***B*** | ***SE B (HC0)*** | ***t*** | ***p*** | ***ΔR2*** | ***Var f2*** |  |  |
| Constant | 16.80 | .57 | 29.45 | .000 |  |  |  |  |
| Extraversion | -1.03 | .18 | -5.63 | .000 |  |  |  |  |
| Observing | -.19 | .12 | -1.61 | .109 |  |  |  |  |
| Extraversion × Observing | -.01 | .04 | -.31 | .756 | .000 | .000 |  |  |
| Dependent variable | ***R*** | ***R2*** | ***MSE*** | ***F (HC0)*** | ***df1*** | ***df2*** | ***f2*** | ***p*** |
| Time perception | .23 | .05 | 51.61 | 4.67 | 3 | 200 | .05 | .004 |
|  | ***B*** | ***SE B (HC0)*** | ***t*** | ***p*** | ***ΔR2*** | ***Var f2*** |  |  |
| Constant | 13.41 | .52 | 25.82 | .000 |  |  |  |  |
| Extraversion | -.56 | .17 | -3.27 | .001 |  |  |  |  |
| Observing | .03 | .12 | .28 | .780 |  |  |  |  |
| Extraversion × Observing | -.01 | .04 | -.34 | .734 | .001 | .001 |  |  |
| Dependent variable | ***R*** | ***R2*** | ***MSE*** | ***F (HC0)*** | ***df1*** | ***df2*** | ***f2*** | ***p*** |
| Boredom | .34 | .12 | 1399.1 | 9.71 | 3 | 200 | .14 | 0.000 |
|  | ***B*** | ***SE B (HC0)*** | ***t*** | ***p*** | ***ΔR2*** | ***Var f2*** |  |  |
| Constant | 101.94 | 2.63 | 38.76 | .000 |  |  |  |  |
| Extraversion | -4.11 | .85 | -4.85 | .000 |  |  |  |  |
| Observing | -.56 | .55 | -1.01 | .310 |  |  |  |  |
| Extraversion × Observing | -.15 | .18 | -.82 | .413 | .003 | .003 |  |  |
|  |  |  |  |  |  |  |  |  |

Table S5. Main and interaction effects between describing and extraversion in predicting boredom and its dimensions

| Dependent variable | *R* | *R2* | *MSE* | *F (HC0)* | *df1* | *df2* | *f2* | *p* |
| --- | --- | --- | --- | --- | --- | --- | --- | --- |
| Disengagement | .49 | .24 | 167.64 | 23.44 | 3 | 200 | .32 | .000 |
| ***B*** | ***SE B (HC0)*** | ***t*** | ***p*** | ***ΔR2*** | ***Var f2*** |  |  |
| Constant | 39.31 | .99 | 39.63 | .000 |  |  |  |  |
| Extraversion | -.29 | .32 | -.92 | .358 |  |  |  |  |
| Describing | -1.26 | .19 | -6.71 | .000 |  |  |  |  |
| Extraversion × Describing | -.12 | .04 | -3.01 | .003 | .020 | .020 |  |  |
| Dependent variable | ***R*** | ***R2*** | ***MSE*** | ***F (HC0)*** | ***df1*** | ***df2*** | ***f2*** | ***p*** |
| Inattention | .52 | .27 | 30.99 | 26.92 | 3 | 200 | .37 | .000 |
|  | ***B*** | ***SE B (HC0)*** | ***t*** | ***p*** | ***ΔR2*** | ***Var f2*** |  |  |
| Constant | 15.31 | .41 | 37.47 | .000 |  |  |  |  |
| Extraversion | .05 | .13 | .40 | .69 |  |  |  |  |
| Describing | -.64 | .08 | -8.26 | .000 |  |  |  |  |
| Extraversion × Describing | -.02 | .02 | -.85 | .396 | .002 | .002 |  |  |
| Dependent variable | ***R*** | ***R2*** | ***MSE*** | ***F (HC0)*** | ***df1*** | ***df2*** | ***f2*** | ***p*** |
| High arousal | .48 | .23 | 45.23 | 24.58 | 3 | 200 | .30 | .000 |
|  | ***B*** | ***SE B (HC0)*** | ***t*** | ***p*** | ***ΔR2*** | ***Var f2*** |  |  |
| Constant | 18.05 | .52 | 34.90 | .000 |  |  |  |  |
| Extraversion | -.26 | .17 | -1.55 | .123 |  |  |  |  |
| Describing | -.59 | .10 | -6.02 | .000 |  |  |  |  |
| Extraversion × Describing | -.02 | .02 | -.930 | .354 | .002 | .002 |  |  |
| Dependent variable | ***R*** | ***R2*** | ***MSE*** | ***F (HC0)*** | ***df1*** | ***df2*** | ***f2*** | ***p*** |
| Low arousal | .50 | .25 | 58.12 | 27.62 | 3 | 200 | .33 | .000 |
|  | ***B*** | ***SE B (HC0)*** | ***t*** | ***p*** | ***ΔR2*** | ***Var f2*** |  |  |
| Constant | 17.10 | .59 | 29.00 | .000 |  |  |  |  |
| Extraversion | -.55 | .19 | -2.87 | .005 |  |  |  |  |
| Describing | -.64 | .11 | -5.85 | .000 |  |  |  |  |
| Extraversion × Describing | -.04 | .02 | -1.63 | .105 | .007 | .007 |  |  |
| Dependent variable | ***R*** | ***R2*** | ***MSE*** | ***F (HC0)*** | ***df1*** | ***df2*** | ***f2*** | ***p*** |
| Time perception | .32 | .10 | 48.85 | 6.36 | 3 | 200 | .12 | .000 |
|  | ***B*** | ***SE B (HC0)*** | ***t*** | ***p*** | ***ΔR2*** | ***Var f2*** |  |  |
| Constant | 13.48 | .54 | 25.14 | .000 |  |  |  |  |
| Extraversion | -.24 | .16 | -1.45 | .148 |  |  |  |  |
| Describing | -.36 | .11 | -3.39 | .001 |  |  |  |  |
| Extraversion × Describing | -.01 | .02 | -.59 | .556 | .001 | .001 |  |  |
| Dependent variable | ***R*** | ***R2*** | ***MSE*** | ***F (HC0)*** | ***df1*** | ***df2*** | ***f2*** | ***p*** |
| Boredom | .53 | .28 | 1142.7 | 28.33 | 3 | 200 | .39 | .000 |
|  | ***B*** | ***SE B (HC0)*** | ***t*** | ***p*** | ***ΔR2*** | ***Var f2*** |  |  |
| Constant | 103.25 | 2.55 | 40.48 | .000 |  |  |  |  |
| Extraversion | -1.29 | .80 | -1.61 | .109 |  |  |  |  |
| Describing | -3.48 | .48 | -7.19 | .000 |  |  |  |  |
| Extraversion × Describing | -.20 | .10 | -2.09 | .038 | .01 | .01 |  |  |

Table S6. Main and interaction effects between acting with awareness and extraversion in predicting boredom and its dimensions

| Dependent variable | *R* | *R2* | *MSE* | *F (HC0)* | *df1* | *df2* | *f2* | *p* |
| --- | --- | --- | --- | --- | --- | --- | --- | --- |
| Disengagement | .51 | .26 | 162.28 | 26.58 | 3 | 200 | .35 | .000 |
| ***B*** | ***SE B (HC0)*** | ***t*** | ***p*** | ***ΔR2*** | ***Var f2*** |  |  |
| Constant | 38.63 | .92 | 41.86 | .000 |  |  |  |  |
| Extraversion | -.75 | .28 | -2.69 | .008 |  |  |  |  |
| Act | -1.10 | .15 | -7.28 | .000 |  |  |  |  |
| Extraversion × Act | -.06 | .05 | -1.35 | .180 | .006 | .006 |  |  |
| Dependent variable | ***R*** | ***R2*** | ***MSE*** | ***F (HC0)*** | ***df1*** | ***df2*** | ***f2*** | ***p*** |
| Inattention | .73 | .53 | 20.10 | 100.53 | 3 | 200 | 1.13 | .000 |
|  | ***B*** | ***SE B (HC0)*** | ***t*** | ***p*** | ***ΔR2*** | ***Var f2*** |  |  |
| Constant | 15.23 | .33 | 46.21 | .000 |  |  |  |  |
| Extraversion | -.11 | .10 | -1.07 | .288 |  |  |  |  |
| Act | -.76 | .05 | -15.56 | .000 |  |  |  |  |
| Extraversion × Act | -.01 | .02 | -.85 | .397 | .001 | .001 |  |  |
| Dependent variable | ***R*** | ***R2*** | ***MSE*** | ***F (HC0)*** | ***df1*** | ***df2*** | ***f2*** | ***p*** |
| High arousal | .55 | .31 | 40.48 | 31.56 | 3 | 200 | .45 | .000 |
|  | ***B*** | ***SE B (HC0)*** | ***t*** | ***p*** | ***ΔR2*** | ***Var f2*** |  |  |
| Constant | 18.01 | .48 | 37.24 | .000 |  |  |  |  |
| Extraversion | -.46 | .15 | -3.06 | .003 |  |  |  |  |
| Act | -.60 | .09 | -6.95 | .000 |  |  |  |  |
| Extraversion × Act | -.02 | .03 | -.87 | .388 | .004 | .004 |  |  |
| Dependent variable | ***R*** | ***R2*** | ***MSE*** | ***F (HC0)*** | ***df1*** | ***df2*** | ***f2*** | ***p*** |
| Low arousal | .55 | .31 | 54.46 | 38.51 | 3 | 200 | .45 | .000 |
|  | ***B*** | ***SE B (HC0)*** | ***t*** | ***p*** | ***ΔR2*** | ***Var f2*** |  |  |
| Constant | 16.92 | .56 | 29.97 | .000 |  |  |  |  |
| Extraversion | -.78 | .18 | -4.45 | .000 |  |  |  |  |
| Act | -.61 | .09 | -6.51 | .000 |  |  |  |  |
| Extraversion × Act | -.03 | .03 | -1.06 | .292 | .004 | .004 |  |  |
| Dependent variable | ***R*** | ***R2*** | ***MSE*** | ***F (HC0)*** | ***df1*** | ***df2*** | ***f2*** | ***p*** |
| Time perception | .44 | .19 | 44.01 | 15.59 | 3 | 200 | .23 | .000 |
|  | ***B*** | ***SE B (HC0)*** | ***t*** | ***p*** | ***ΔR2*** | ***Var f2*** |  |  |
| Constant | 13.28 | .49 | 27.27 | .000 |  |  |  |  |
| Extraversion | -.29 | .14 | -2.09 | .038 |  |  |  |  |
| Act | -.46 | .09 | -5.35 | .000 |  |  |  |  |
| Extraversion × Act | .02 | .02 | .73 | .467 | .002 | .002 |  |  |
| Dependent variable | ***R*** | ***R2*** | ***MSE*** | ***F (HC0)*** | ***df1*** | ***df2*** | ***f2*** | ***p*** |
| Boredom | .62 | .38 | 983.89 | 45.06 | 3 | 200 | .61 | .000 |
|  | ***B*** | ***SE B (HC0)*** | ***t*** | ***p*** | ***ΔR2*** | ***Var f2*** |  |  |
| Constant | 102.06 | 2.32 | 43.96 | .000 |  |  |  |  |
| Extraversion | -2.39 | .69 | -3.45 | .001 |  |  |  |  |
| Act | -3.54 | .39 | -9.02 | .000 |  |  |  |  |
| Extraversion × Act | -.11 | .12 | -.92 | .360 | .003 | .003 |  |  |

Table S7. Main and interaction effects between nonjudging and extraversion in predicting boredom and its dimensions

| Dependent variable | *R* | *R2* | *MSE* | *F (HC0)* | *df1* | *df2* | *f2* | *p* |
| --- | --- | --- | --- | --- | --- | --- | --- | --- |
| Disengagement | .53 | .29 | 156.98 | 29.21 | 3 | 200 | .41 | .000 |
| ***B*** | ***SE B (HC0)*** | ***t*** | ***p*** | ***ΔR2*** | ***Var f2*** |  |  |
| Constant | 38.62 | .87 | 44.20 | .000 |  |  |  |  |
| Extraversion | -.89 | .26 | -3.37 | .001 |  |  |  |  |
| Nonjudging | -1.11 | .14 | -8.02 | .000 |  |  |  |  |
| Extraversion × Nonjudging | -.08 | .03 | -2.35 | .020 | .012 | .012 |  |  |
| Dependent variable | ***R*** | ***R2*** | ***MSE*** | ***F (HC0)*** | ***df1*** | ***df2*** | ***f2*** | ***p*** |
| Inattention | .61 | .38 | 26.52 | 45.62 | 3 | 200 | .62 | .000 |
|  | ***B*** | ***SE B (HC0)*** | ***t*** | ***p*** | ***ΔR2*** | ***Var f2*** |  |  |
| Constant | 15.21 | .36 | 42.26 | .000 |  |  |  |  |
| Extraversion | -.27 | .11 | -2.50 | .013 |  |  |  |  |
| Nonjudging | -.60 | .05 | -10.92 | .000 |  |  |  |  |
| Extraversion × Nonjudging | -.01 | .02 | -.92 | .357 | .002 | .002 |  |  |
| Dependent variable | ***R*** | ***R2*** | ***MSE*** | ***F (HC0)*** | ***df1*** | ***df2*** | ***f2*** | ***p*** |
| High arousal | .58 | .34 | 38.73 | 33.01 | 3 | 200 | .52 | .000 |
|  | ***B*** | ***SE B (HC0)*** | ***t*** | ***p*** | ***ΔR2*** | ***Var f2*** |  |  |
| Constant | 17.98 | .44 | 40.52 | .000 |  |  |  |  |
| Extraversion | -.53 | .14 | -3.84 | .000 |  |  |  |  |
| Nonjudging | -.61 | .08 | -7.78 | .000 |  |  |  |  |
| Extraversion × Nonjudging | -.03 | .02 | -1.21 | .226 | .005 | .005 |  |  |
| Dependent variable | ***R*** | ***R2*** | ***MSE*** | ***F (HC0)*** | ***df1*** | ***df2*** | ***f2*** | ***p*** |
| Low arousal | .57 | .33 | 52.85 | 36.66 | 3 | 200 | .49 | .000 |
|  | ***B*** | ***SE B (HC0)*** | ***t*** | ***p*** | ***ΔR2*** | ***Var f2*** |  |  |
| Constant | 16.86 | .52 | 32.14 | .000 |  |  |  |  |
| Extraversion | -.85 | .17 | -5.08 | .000 |  |  |  |  |
| Nonjudging | -.61 | .09 | -7.01 | .000 |  |  |  |  |
| Extraversion × Nonjudging | -.03 | .03 | -1.07 | .288 | .004 | .004 |  |  |
| Dependent variable | ***R*** | ***R2*** | ***MSE*** | ***F (HC0)*** | ***df1*** | ***df2*** | ***f2*** | ***p*** |
| Time perception | .43 | .18 | 44.49 | 14.68 | 3 | 200 | .22 | .000 |
|  | ***B*** | ***SE B (HC0)*** | ***t*** | ***p*** | ***ΔR2*** | ***Var f2*** |  |  |
| Constant | 13.27 | .47 | 28.25 | .000 |  |  |  |  |
| Extraversion | -.37 | .13 | -2.76 | .006 |  |  |  |  |
| Nonjudging | -.41 | .08 | -5.36 | .000 |  |  |  |  |
| Extraversion × Nonjudging | .03 | .02 | 1.28 | .202 | .006 | .006 |  |  |
| Dependent variable | ***R*** | ***R2*** | ***MSE*** | ***F (HC0)*** | ***df1*** | ***df2*** | ***f2*** | ***p*** |
| Boredom | .61 | .37 | 988.63 | 40.31 | 3 | 200 | .59 | .000 |
|  | ***B*** | ***SE B (HC0)*** | ***t*** | ***p*** | ***ΔR2*** | ***Var f2*** |  |  |
| Constant | 101.95 | 2.20 | 46.39 | .000 |  |  |  |  |
| Extraversion | -2.92 | .66 | -4.40 | .000 |  |  |  |  |
| Nonjudging | -3.34 | .37 | -9.05 | .000 |  |  |  |  |
| Extraversion × Nonjudging | -.12 | .10 | -1.26 | .210 | .004 | .004 |  |  |

Table S8. Main and interaction effects between nonreactivity and extraversion in predicting boredom and its dimensions

| Dependent variable | *R* | *R2* | *MSE* | *F (HC0)* | *df1* | *df2* | *f2* | *p* |
| --- | --- | --- | --- | --- | --- | --- | --- | --- |
| Disengagement | .37 | .14 | 189.18 | 12.73 | 3 | 200 | .16 | .000 |
| ***B*** | ***SE B (HC0)*** | ***t*** | ***p*** | ***ΔR2*** | ***Var f2*** |  |  |
| Constant | 38.47 | .97 | 39.64 | .000 |  |  |  |  |
| Extraversion | -1.19 | .30 | -3.94 | .000 |  |  |  |  |
| Nonreactivity | -1.05 | .289 | -3.64 | .000 |  |  |  |  |
| Extraversion × Nonreactivity | -.12 | .09 | -1.35 | .180 | .008 | .008 |  |  |
| Dependent variable | ***R*** | ***R2*** | ***MSE*** | ***F (HC0)*** | ***df1*** | ***df2*** | ***f2*** | ***p*** |
| Inattention | .35 | .12 | 37.25 | 9.67 | 3 | 200 | .14 | .000 |
| ***B*** | ***SE B (HC0)*** | ***t*** | ***p*** | ***ΔR2*** | ***Var f2*** |  |  |
| Constant | 15.14 | .43 | 35.10 | .000 |  |  |  |  |
| Extraversion | -.44 | .14 | -3.12 | .002 |  |  |  |  |
| Nonreactivity | -.43 | .13 | -3.38 | .001 |  |  |  |  |
| Extraversion × Nonreactivity | .01 | .04 | .27 | .784 | .000 | .000 |  |  |
| Dependent variable | ***R*** | ***R2*** | ***MSE*** | ***F (HC0)*** | ***df1*** | ***df2*** | ***f2*** | ***p*** |
| High arousal | .41 | .17 | 48.43 | 18.55 | 3 | 200 | .20 | .000 |
| ***B*** | ***SE B (HC0)*** | ***t*** | ***p*** | ***ΔR2*** | ***Var f2*** |  |  |
| Constant | 17.93 | .50 | 35.84 | .000 |  |  |  |  |
| Extraversion | -.70 | .16 | -4.41 | .000 |  |  |  |  |
| Nonreactivity | -.58 | .15 | -3.96 | .000 |  |  |  |  |
| Extraversion × Nonreactivity | -.04 | .04 | -.88 | .378 | .003 | .003 |  |  |
| Dependent variable | ***R*** | ***R2*** | ***MSE*** | ***F (HC0)*** | ***df1*** | ***df2*** | ***f2*** | ***p*** |
| Low arousal | .46 | .21 | 61.70 | 25.83 | 3 | 200 | .27 | .000 |
| ***B*** | ***SE B (HC0)*** | ***t*** | ***p*** | ***ΔR2*** | ***Var f2*** |  |  |
| Constant | 16.82 | .56 | 29.88 | .000 |  |  |  |  |
| Extraversion | -1.01 | .17 | -5.92 | .000 |  |  |  |  |
| Nonreactivity | -.65 | .16 | -4.15 | .000 |  |  |  |  |
| Extraversion × Nonreactivity | -.05 | .05 | -.94 | .346 | .004 | .004 |  |  |
| Dependent variable | ***R*** | ***R2*** | ***MSE*** | ***F (HC0)*** | ***df1*** | ***df2*** | ***f2*** | ***p*** |
| Time perception | .26 | .07 | 50.83 | 6.32 | 3 | 200 | .07 | .000 |
| ***B*** | ***SE B (HC0)*** | ***t*** | ***p*** | ***ΔR2*** | ***Var f2*** |  |  |
| Constant | 13.39 | .51 | 26.41 | .000 |  |  |  |  |
| Extraversion | -.51 | .15 | -3.36 | .001 |  |  |  |  |
| Nonreactivity | -.25 | .15 | -1.69 | .093 |  |  |  |  |
| Extraversion × Nonreactivity | -.01 | 05 | -.29 | .769 | .000 | .000 |  |  |
| Dependent variable | ***R*** | ***R2*** | ***MSE*** | ***F (HC0)*** | ***df1*** | ***df2*** | ***f2*** | ***p*** |
| Boredom | .42 | .18 | 1295.63 | 18.23 | 3 | 200 | .22 | .000 |
|  | ***B*** | ***SE B (HC0)*** | ***t*** | ***p*** | ***ΔR2*** | ***Var f2*** |  |  |
| Constant | 101.76 | 2.57 | 39.55 | .000 |  |  |  |  |
| Extraversion | -3.85 | .80 | -4.83 | .000 |  |  |  |  |
| Nonreactivity | -2.96 | .78 | -3.80 | .000 |  |  |  |  |
| Extraversion × Nonreactivity | -.21 | .25 | -.84 | .401 | .004 | .004 |  |  |
|  |  |  |  |  |  |  |  |  |

Table S9. Main and interaction effects between mindfulness and extraversion as well as between wisdom and extraversion in predicting boredom and its dimensions.

| Dependent variable | *R* | *R2* | *MSE* | *F (HC0)* | *df1* | *df2* | *p* | *f2* |
| --- | --- | --- | --- | --- | --- | --- | --- | --- |
| Disengagement | .49 | .24 | 169.55 | 14.29 | 5 | 198 | .00 | .32 |
|  | ***B*** | ***SE B (HC0)*** | ***t*** | ***p*** | ***ΔR2*** | ***Var f2*** |  |  |
| Constant | 38.57 | .91 | 42.34 | .00 |  |  |  |  |
| Extraversion | -.92 | .28 | -3.24 | .00 |  |  |  |  |
| Mindfulness | -.03 | .05 | -.58 | .56 |  |  |  |  |
| Extraversion × Mindfulness | .00 | .02 | -.20 | .84 | .00 | .00 |  |  |
| Wisdom | -1.34 | .21 | -6.35 | .00 |  |  |  |  |
| Extraversion × Wisdom | -.08 | .07 | -1.11 | .27 | .00 | .00 |  |  |
| Both Moderators |  | F=.91 |  | .194 | .01 | .01 |  |  |
| Dependent variable | ***R*** | ***R2*** | ***MSE*** | ***F (HC0)*** | ***df1*** | ***df2*** | ***p*** | ***f2*** |
| Inattention | .53 | .28 | 31.02 | 20.12 | 5 | 198 | .00 | .39 |
|  | ***B*** | ***SE B (HC0)*** | ***t*** | ***p*** | ***ΔR2*** | ***Var f2*** |  |  |
| Constant | 15.14 | .40 | 38.14 | .00 |  |  |  |  |
| Extraversion | -.25 | .13 | -1.99 | .05 |  |  |  |  |
| Mindfulness | -.05 | .03 | -2.00 | .05 |  |  |  |  |
| Extraversion × Mindfulness | .00 | .01 | -.17 | .86 | .00 | .00 |  |  |
| Wisdom | -.61 | .10 | -6.32 | .00 |  |  |  |  |
| Extraversion × Wisdom | .02 | .03 | .53 | .60 | .00 | .00 |  |  |
| Both Moderators |  | F=.15 |  | .86 | .00 | .00 |  |  |
| Dependent variable | ***R*** | ***R2*** | ***MSE*** | ***F (HC0)*** | ***df1*** | ***df2*** | ***p*** | ***f2*** |
| High arousal | .54 | .29 | 41.71 | 20.75 | 5 | 198 | .00 | .41 |
|  | ***B*** | ***SE B (HC0)*** | ***t*** | ***p*** | ***ΔR2*** | ***Var f2*** |  |  |
| Constant | 17.98 | .46 | 38.84 | .00 |  |  |  |  |
| Extraversion | -.52 | .14 | -3.62 | .00 |  |  |  |  |
| Mindfulness | -.03 | .03 | -1.33 | .18 |  |  |  |  |
| Extraversion × Mindfulness | .00 | .01 | -.17 | .86 | .00 | .00 |  |  |
| Wisdom | -.74 | .11 | -6.86 | .00 |  |  |  |  |
| Extraversion × Wisdom | -.03 | .04 | -.80 | .42 | .00 | .00 |  |  |
| Both Moderators |  | F = .45 |  | .64 | .00 | .00 |  |  |
| Dependent variable | ***R*** | ***R2*** | ***MSE*** | ***F (HC0)*** | ***df1*** | ***df2*** | ***p*** | ***f2*** |
| Low arousal | .57 | .32 | 53.76 | 25.82 | 5 | 198 | .00 | .47 |
|  | ***B*** | ***SE B (HC0)*** | ***t*** | ***p*** | ***ΔR2*** | ***Var f2*** |  |  |
| Constant | 16.86 | .53 | 31.56 | .00 |  |  |  |  |
| Extraversion | -.83 | .17 | -4.95 | .00 |  |  |  |  |
| Mindfulness | -.03 | .03 | -1.10 | .27 |  |  |  |  |
| Extraversion × Mindfulness | .00 | .01 | .06 | .95 | .00 | .00 |  |  |
| Wisdom | -.82 | .11 | -7.23 | .00 |  |  |  |  |
| Extraversion × Wisdom | -.04 | .04 | -1.08 | .28 | .00 | .00 |  |  |
| Both Moderators |  | F = .65 |  | .53 | .00 | .00 |  |  |
| Dependent variable | ***R*** | ***R2*** | ***MSE*** | ***F (HC0)*** | ***df1*** | ***df2*** | ***p*** | ***f2*** |
| Time perception | .31 | .09 | 49.87 | 4.87 | 5 | 198 | .00 | .10 |
|  | ***B*** | ***SE B (HC0)*** | ***t*** | ***p*** | ***ΔR2*** | ***Var f2*** |  |  |
| Constant | 13.26 | .51 | 26.10 | .00 |  |  |  |  |
| Extraversion | -.44 | .15 | -2.88 | .00 |  |  |  |  |
| Mindfulness | .00 | .03 | .05 | .96 |  |  |  |  |
| Extraversion × Mindfulness | .01 | .01 | .88 | .38 | .01 | .01 |  |  |
| Wisdom | -.31 | .13 | -2.46 | .01 |  |  |  |  |
| Extraversion × Wisdom | -.01 | .04 | -.29 | .77 | .00 | .00 |  |  |
| Both Moderators |  | F = .39 |  | .67 | .01 | .01 |  |  |
| Dependent variable | ***R*** | ***R2*** | ***MSE*** | ***F (HC0)*** | ***df1*** | ***df2*** | ***p*** | ***f2*** |
| Boredom | .55 | .30 | 1121.03 | 21.61 | 5 | 198 | .00 | .43 |
|  | ***B*** | ***SE B (HC0)*** | ***t*** | ***p*** | ***ΔR2*** | ***Var f2*** |  |  |
| Constant | 101.82 | 2.37 | 43.04 | .00 |  |  |  |  |
| Extraversion | -2.96 | .73 | -4.06 | .00 |  |  |  |  |
| Mindfulness | -.14 | .14 | -1.00 | .32 |  |  |  |  |
| Extraversion × Mindfulness | .00 | .04 | .07 | .95 | .00 | .00 |  |  |
| Wisdom | -3.81 | .55 | -6.88 | .00 |  |  |  |  |
| Extraversion × Wisdom | -.15 | .18 | -.82 | .41 | .00 | .00 |  |  |
| Both Moderators |  | F = .40 |  | .67 | .00 | .00 |  |  |

Table S10. Main and interaction effects between observing and extraversion as well as between wisdom and extraversion in predicting boredom and its dimensions.

| Dependent variable | *R* | *R2* | *MSE* | *F (HC0)* | *df1* | *df2* | *p* | *f2* |
| --- | --- | --- | --- | --- | --- | --- | --- | --- |
| Disengagement | .49 | .24 | 168.73 | 15.21 | 5 | 198 | .00 | .32 |
|  | ***B*** | ***SE B (HC0)*** | ***t*** | ***p*** | ***ΔR2*** | ***Var f2*** |  |  |
| Constant | 38.59 | .91 | 42.26 | .00 |  |  |  |  |
| Extraversion | -1.04 | .29 | -3.56 | .00 |  |  |  |  |
| Observing | .25 | .20 | 1.27 | .21 |  |  |  |  |
| Extraversion × Observing | -.03 | .06 | -.47 | .64 | .00 | .00 |  |  |
| Wisdom | -1.43 | .20 | -7.13 | .00 |  |  |  |  |
| Extraversion × Wisdom | -.07 | .06 | -1.15 | .25 | .00 | .00 |  |  |
| Both Moderators |  | F= .84 |  | .43 | .01 | .01 |  |  |
| Dependent variable | ***R*** | ***R2*** | ***MSE*** | ***F (HC0)*** | ***df1*** | ***df2*** | ***p*** | ***f2*** |
| Inattention | .50 | .25 | 32.10 | 17.68 | 5 | 198 | .00 | .33 |
|  | ***B*** | ***SE B (HC0)*** | ***t*** | ***p*** | ***ΔR2*** | ***Var f2*** |  |  |
| Constant | 15.21 | .41 | 37.52 | .00 |  |  |  |  |
| Extraversion | -.37 | .13 | -2.90 | .00 |  |  |  |  |
| Observing | .06 | .09 | .63 | .53 |  |  |  |  |
| Extraversion × Observing | -.05 | .03 | -1.58 | .12 | .01 | .01 |  |  |
| Wisdom | -.66 | .08 | -7.77 | .00 |  |  |  |  |
| Extraversion × Wisdom | .04 | .03 | 1.43 | .15 | .01 | .01 |  |  |
| Both Moderators |  | F=2.10 |  | .12 | .01 | .01 |  |  |
| Dependent variable | ***R*** | ***R2*** | ***MSE*** | ***F (HC0)*** | ***df1*** | ***df2*** | ***p*** | ***f2*** |
| High arousal | .47 | .22 | 41.56 | 7.60 | 5 | 133 | .000 | .28 |
|  | ***B*** | ***SE B (HC0)*** | ***t*** | ***p*** | ***ΔR2*** | ***Var f2*** |  |  |
| Constant | 17.67 | .57 | 30.88 | .000 |  |  |  |  |
| Extraversion | -.51 | .19 | -2.66 | .009 |  |  |  |  |
| Observing | .1 | .14 | 1.20 | .232 |  |  |  |  |
| Extraversion × Observing | .02 | .04 | .39 | .698 | .000 | .000 |  |  |
| Wisdom | -.68 | .14 | -4.76 | .000 |  |  |  |  |
| Extraversion × Wisdom | -.01 | .05 | -.14 | .892 | .000 | .000 |  |  |
| Both Moderators |  | F = .08 |  | .925 | .000 | .000 |  |  |
| Dependent variable | ***R*** | ***R2*** | ***MSE*** | ***F (HC0)*** | ***df1*** | ***df2*** | ***p*** | ***f2*** |
| Low arousal | .54 | .29 | 42.07 | 19.75 | 5 | 198 | .00 | .41 |
|  | ***B*** | ***SE B (HC0)*** | ***t*** | ***p*** | ***ΔR2*** | ***Var f2*** |  |  |
| Constant | 17.99 | .46 | 39.37 | .00 |  |  |  |  |
| Extraversion | -.61 | .15 | -4.09 | .00 |  |  |  |  |
| Observing | .11 | .10 | 1.03 | .30 |  |  |  |  |
| Extraversion × Observing | -.02 | .03 | -.54 | .59 | .00 | .00 |  |  |
| Wisdom | -.79 | .11 | -7.37 | .00 |  |  |  |  |
| Extraversion × Wisdom | -.02 | .04 | -.56 | .58 | .00 | .00 |  |  |
| Both Moderators |  | F = .43 |  | .65 | .00 | .00 |  |  |
| Dependent variable | ***R*** | ***R2*** | ***MSE*** | ***F (HC0)*** | ***df1*** | ***df2*** | ***p*** | ***f2*** |
| Time perception | .31 | .10 | 49.81 | 5.23 | 5 | 198 | .00 | .11 |
|  | ***B*** | ***SE B (HC0)*** | ***t*** | ***p*** | ***ΔR2*** | ***Var f2*** |  |  |
| Constant | 13.39 | .51 | 26.04 | .00 |  |  |  |  |
| Extraversion | -.50 | .17 | -2.99 | .00 |  |  |  |  |
| Observing | .14 | .12 | 1.15 | .25 |  |  |  |  |
| Extraversion × Observing | -.01 | .04 | -.29 | .78 | .00 | .00 |  |  |
| Wisdom | -.37 | .12 | -2.97 | .00 |  |  |  |  |
| Extraversion × Wisdom | .00 | .03 | .05 | .96 | .00 | .00 |  |  |
| Both Moderators |  | F = .04 |  | .96 | .00 | .00 |  |  |
| Dependent variable | ***R*** | ***R2*** | ***MSE*** | ***F (HC0)*** | ***df1*** | ***df2*** | ***p*** | ***f2*** |
| Boredom | .54 | .30 | 1122.46 | 21.89 | 5 | 198 | .00 | .43 |
|  | ***B*** | ***SE B (HC0)*** | ***t*** | ***p*** | ***ΔR2*** | ***Var f2*** |  |  |
| Constant | 102.03 | 2.36 | 43.20 | .00 |  |  |  |  |
| Extraversion | -3.39 | .75 | -4.49 | .00 |  |  |  |  |
| Observing | .61 | .52 | 1.16 | .25 |  |  |  |  |
| Extraversion × Observing | -.10 | .17 | -.62 | .54 | .00 | .00 |  |  |
| Wisdom | -4.12 | .52 | -7.92 | .00 |  |  |  |  |
| Extraversion × Wisdom | -.09 | .15 | -.56 | .57 | .00 | .00 |  |  |
| Both Moderators |  | F = .41 |  | .66 | .00 | .00 |  |  |

Table S11. Main and interaction effects between describing and extraversion as well as between wisdom and extraversion in predicting boredom and its dimensions

| Dependent variable | *R* | *R2* | *MSE* | *F (HC0)* | *df1* | *df2* | *p* | *f2* |
| --- | --- | --- | --- | --- | --- | --- | --- | --- |
| Disengagement | .56 | .31 | 152.48 | 26.95 | 5 | 198 | .00 | .45 |
|  | ***B*** | ***SE B (HC0)*** | ***t*** | ***p*** | ***ΔR2*** | ***Var f2*** |  |  |
| Constant | 39.10 | .94 | 41.50 | .00 |  |  |  |  |
| Extraversion | -.28 | .30 | -.95 | .34 |  |  |  |  |
| Describing | -.94 | .19 | -5.10 | .00 |  |  |  |  |
| Extraversion × Describing | -.09 | .04 | -2.13 | .03 | .01 | .01 |  |  |
| Wisdom | -1.01 | .21 | -4.85 | .00 |  |  |  |  |
| Extraversion × Wisdom | -.02 | .07 | -.26 | .79 | .00 | .00 |  |  |
| Both Moderators |  | F=3.22 |  | .04 | .01 | .01 |  |  |
| Dependent variable | ***R*** | ***R2*** | ***MSE*** | ***F (HC0)*** | ***df1*** | ***df2*** | ***p*** | ***f2*** |
| Inattention | .60 | .36 | 27.39 | 34.34 | 5 | 198 | .00 | .56 |
|  | ***B*** | ***SE B (HC0)*** | ***t*** | ***p*** | ***ΔR2*** | ***Var f2*** |  |  |
| Constant | 15.19 | .37 | 40.80 | .00 |  |  |  |  |
| Extraversion | .08 | .11 | .69 | .49 |  |  |  |  |
| Describing | -.51 | .07 | -7.38 | .00 |  |  |  |  |
| Extraversion × Describing | -.02 | .02 | -.87 | .38 | .00 | .00 |  |  |
| Wisdom | -.46 | .08 | -6.07 | .00 |  |  |  |  |
| Extraversion × Wisdom | .05 | .03 | 1.80 | .07 | .01 | .01 |  |  |
| Both Moderators |  | F= 1.73 |  | .18 | .01 | .01 |  |  |
| Dependent variable | ***R*** | ***R2*** | ***MSE*** | ***F (HC0)*** | ***df1*** | ***df2*** | ***p*** | ***f2*** |
| High arousal | .58 | .34 | 39.23 | 26.93 | 5 | 198 | .00 | .52 |
|  | ***B*** | ***SE B (HC0)*** | ***t*** | ***p*** | ***ΔR2*** | ***Var f2*** |  |  |
| Constant | 17.92 | .48 | 37.69 | .00 |  |  |  |  |
| Extraversion | -.25 | .15 | -1.71 | .09 |  |  |  |  |
| Describing | -.39 | .09 | -4.21 | .00 |  |  |  |  |
| Extraversion × Describing | .00 | .02 | -.02 | .99 | .00 | .00 |  |  |
| Wisdom | -.62 | .11 | -5.75 | .00 |  |  |  |  |
| Extraversion × Wisdom | -.02 | .04 | -.42 | .68 | .00 | .00 |  |  |
| Both Moderators |  | F = .11 |  | .89 | .00 | .00 |  |  |
| Dependent variable | ***R*** | ***R2*** | ***MSE*** | ***F (HC0)*** | ***df1*** | ***df2*** | ***p*** | ***f2*** |
| Low arousal | .60 | .36 | 50.72 | 30.59 | 5 | 198 | .00 | .56 |
|  | ***B*** | ***SE B (HC0)*** | ***t*** | ***p*** | ***ΔR2*** | ***Var f2*** |  |  |
| Constant | 16.96 | .55 | 30.80 | .00 |  |  |  |  |
| Extraversion | -.54 | .18 | -3.00 | .00 |  |  |  |  |
| Describing | -.42 | .11 | -3.92 | .00 |  |  |  |  |
| Extraversion × Describing | -.02 | .03 | -.71 | .48 | .00 | .00 |  |  |
| Wisdom | -.69 | .12 | -5.89 | .00 |  |  |  |  |
| Extraversion × Wisdom | -.02 | .04 | -.44 | .66 | .00 | .00 |  |  |
| Both Moderators |  | F = .60 |  | .55 | .00 | .00 |  |  |
| Dependent variable | ***R*** | ***R2*** | ***MSE*** | ***F (HC0)*** | ***df1*** | ***df2*** | ***p*** | ***f2*** |
| Time perception | .35 | .12 | 48.50 | 6.12 | 5 | 198 | .00 | .15 |
|  | ***B*** | ***SE B (HC0)*** | ***t*** | ***p*** | ***ΔR2*** | ***Var f2*** |  |  |
| Constant | 13.43 | .53 | 25.18 | .00 |  |  |  |  |
| Extraversion | -.23 | .16 | -1.43 | .15 |  |  |  |  |
| Describing | -.29 | .11 | -2.78 | .01 |  |  |  |  |
| Extraversion × Describing | -.01 | .02 | -.45 | .66 | .00 | .00 |  |  |
| Wisdom | -.22 | .12 | -1.81 | .07 |  |  |  |  |
| Extraversion × Wisdom | .01 | .03 | .31 | .76 | .00 | .00 |  |  |
| Both Moderators |  | F = .11 |  | .89 | .00 | .00 |  |  |
| Dependent variable | ***R*** | ***R2*** | ***MSE*** | ***F (HC0)*** | ***df1*** | ***df2*** | ***p*** | ***f2*** |
| Boredom | .61 | .37 | 1004.05 | 34.51 | 5 | 198 | .00 | .59 |
|  | ***B*** | ***SE B (HC0)*** | ***t*** | ***p*** | ***ΔR2*** | ***Var f2*** |  |  |
| Constant | 102.61 | 2.37 | 43.23 | .00 |  |  |  |  |
| Extraversion | -1.23 | .72 | -1.71 | .05 |  |  |  |  |
| Describing | -2.56 | .46 | -5.61 | .00 |  |  |  |  |
| Extraversion × Describing | -.13 | .10 | -1.31 | .19 | .00 | .00 |  |  |
| Wisdom | -3.01 | .53 | -5.71 | .00 |  |  |  |  |
| Extraversion × Wisdom | .01 | .17 | .04 | .97 | .00 | .00 |  |  |
| Both Moderators |  | F = 1.05 |  | .35 | .00 | .00 |  |  |

Table S12. Main and interaction effects between acting with awareness and extraversion as well as between wisdom and extraversion in predicting boredom and its dimensions.

| Dependent variable | *R* | *R2* | *MSE* | *F (HC0)* | *df1* | *df2* | *p* | *f2* |
| --- | --- | --- | --- | --- | --- | --- | --- | --- |
| Disengagement | .54 | .30 | 142.7 | 15.28 | 5 | 133 | .000 | .43 |
|  | ***B*** | ***SE B (HC0)*** | ***t*** | ***p*** | ***ΔR2*** | ***Var f2*** |  |  |
| Constant | 38.30 | 1.02 | 37.51 | .000 |  |  |  |  |
| Extraversion | -.60 | .31 | -1.96 | .052 |  |  |  |  |
| Act | -.98 | .19 | -5.17 | .000 |  |  |  |  |
| Extraversion × Act | -.08 | .05 | -1.46 | .148 | .007 | .007 |  |  |
| Wisdom | -.73 | .26 | -2.77 | .006 |  |  |  |  |
| Extraversion × Wisdom | -.00 | .09 | -.03 | .980 | .000 | .000 |  |  |
| Both Moderators |  | F=.26 |  | .287 | .008 | .008 |  |  |
| Dependent variable | ***R*** | ***R2*** | ***MSE*** | ***F (HC0)*** | ***df1*** | ***df2*** | ***p*** | ***f2*** |
| Inattention | .75 | .56 | 108.2 | 53.27 | 5 | 133 | .000 | 1.27 |
|  | ***B*** | ***SE B (HC0)*** | ***t*** | ***p*** | ***ΔR2*** | ***Var f2*** |  |  |
| Constant | 14.87 | .36 | 41.38 | .000 |  |  |  |  |
| Extraversion | -.11 | .11 | -.99 | .32 |  |  |  |  |
| Act | -.74 | .07 | -11.23 | .000 |  |  |  |  |
| Extraversion × Act | -.02 | .02 | -.99 | .322 | .003 | .003 |  |  |
| Wisdom | -.30 | .10 | -3.08 | .003 |  |  |  |  |
| Extraversion × Wisdom | .03 | .04 | .78 | .43 | .003 | .003 |  |  |
| Both Moderators |  | F=.53 |  | .591 | .004 | .004 |  |  |
| Dependent variable | ***R*** | ***R2*** | ***MSE*** | ***F (HC0)*** | ***df1*** | ***df2*** | ***p*** | ***f2*** |
| High arousal | .59 | .35 | 34.83 | 16.07 | 5 | 133 | .000 | .54 |
|  | ***B*** | ***SE B (HC0)*** | ***t*** | ***p*** | ***ΔR2*** | ***Var f2*** |  |  |
| Constant | 17.92 | .50 | 35.66 | .000 |  |  |  |  |
| Extraversion | -.35 | .15 | -2.60 | .023 |  |  |  |  |
| Act | -.51 | .10 | -4.95 | .000 |  |  |  |  |
| Extraversion × Act | -.05 | .032 | -1.56 | .121 | .011 | .011 |  |  |
| Wisdom | -.45 | .13 | -3.61 | .000 |  |  |  |  |
| Extraversion × Wisdom | -.01 | .05 | -.12 | .901 | .000 | .000 |  |  |
| Both Moderators |  | F = 1.71 |  | .185 | .013 | .013 |  |  |
| Dependent variable | ***R*** | ***R2*** | ***MSE*** | ***F (HC0)*** | ***df1*** | ***df2*** | ***p*** | ***f2*** |
| Low arousal | .63 | .40 | 48.05 | 23.61 | 5 | 133 | .000 | .67 |
|  | ***B*** | ***SE B (HC0)*** | ***t*** | ***p*** | ***ΔR2*** | ***Var f2*** |  |  |
| Constant | 17.35 | .61 | 28.33 | .000 |  |  |  |  |
| Extraversion | -.77 | .19 | -4.09 | .000 |  |  |  |  |
| Act | -.62 | .12 | -5.30 | .000 |  |  |  |  |
| Extraversion × Act | -.04 | .04 | -1.06 | .289 | .005 | .005 |  |  |
| Wisdom | -.50 | .15 | -3.40 | .001 |  |  |  |  |
| Extraversion × Wisdom | -.03 | .06 | -.48 | .632 | .001 | .001 |  |  |
| Both Moderators |  | F = 1.22 |  | .297 | .01 | .01 |  |  |
| Dependent variable | ***R*** | ***R2*** | ***MSE*** | ***F (HC0)*** | ***df1*** | ***df2*** | ***p*** | ***f2*** |
| Time perception | .35 | .12 | 40.10 | 5.23 | 5 | 133 | .000 | .14 |
|  | ***B*** | ***SE B (HC0)*** | ***t*** | ***p*** | ***ΔR2*** | ***Var f2*** |  |  |
| Constant | 12.90 | .57 | 22.75 | .000 |  |  |  |  |
| Extraversion | -.27 | .16 | -1.69 | .094 |  |  |  |  |
| Act | -.32 | .13 | -2.54 | .012 |  |  |  |  |
| Extraversion × Act | -.03 | .03 | -.83 | .41 | .004 | .004 |  |  |
| Wisdom | -.02 | .14 | -.17 | .865 |  |  |  |  |
| Extraversion × Wisdom | .06 | .04 | 1.41 | .160 | .01 | .01 |  |  |
| Both Moderators |  | F = 1.20 |  | .303 | .011 | .011 |  |  |
| Dependent variable | ***R*** | ***R2*** | ***MSE*** | ***F (HC0)*** | ***df1*** | ***df2*** | ***p*** | ***f2*** |
| Boredom | .65 | .43 | 803.05 | 26.72 | 5 | 133 | .000 | .75 |
|  | ***B*** | ***SE B (HC0)*** | ***t*** | ***p*** | ***ΔR2*** | ***Var f2*** |  |  |
| Constant | 101.35 | 2.41 | 42.11 | .000 |  |  |  |  |
| Extraversion | -2.10 | .71 | -2.98 | .003 |  |  |  |  |
| Act | -3.16 | .47 | -6.70 | .000 |  |  |  |  |
| Extraversion × Act | -.22 | .14 | -1.59 | .115 | .008 | .008 |  |  |
| Wisdom | -2.00 | .60 | -3.34 | .001 |  |  |  |  |
| Extraversion × Wisdom | .05 | .21 | .25 | .803 | .000 | .000 |  |  |
| Both Moderators |  | F = 1.35 |  | .263 | .009 | .009 |  |  |

Table S13. Main and interaction effects between nonjudging and extraversion as well as between wisdom and extraversion in predicting boredom and its dimensions.

| Dependent variable | *R* | *R2* | *MSE* | *F (HC0)* | *df1* | *df2* | *p* | *f2* |
| --- | --- | --- | --- | --- | --- | --- | --- | --- |
| Disengagement | .52 | .28 | 146.96 | 13.17 | 5 | 133 | .000 | .43 |
|  | ***B*** | ***SE B (HC0)*** | ***t*** | ***p*** | ***ΔR2*** | ***Var f2*** |  |  |
| Constant | 38.11 | 1.02 | 37.49 | .000 |  |  |  |  |
| Extraversion | -.69 | .31 | -2.26 | .025 |  |  |  |  |
| Nonjudging | -.82 | .20 | -4.11 | .000 |  |  |  |  |
| Extraversion × Nonjudging | -.08 | .06 | -1.46 | .146 | .009 | .009 |  |  |
| Wisdom | -.67 | .26 | -2.51 | .013 |  |  |  |  |
| Extraversion × Wisdom | .048 | .09 | .54 | .588 | .001 | .001 |  |  |
| Both Moderators |  | F=1.07 |  | .345 | .009 | .009 |  |  |
| Dependent variable | ***R*** | ***R2*** | ***MSE*** | ***F (HC0)*** | ***df1*** | ***df2*** | ***p*** | ***f2*** |
| Inattention | .62 | .39 | 25.19 | 20.93 | 5 | 133 | .000 | .64 |
|  | ***B*** | ***SE B (HC0)*** | ***t*** | ***p*** | ***ΔR2*** | ***Var f2*** |  |  |
| Constant | 14.78 | .42 | 35.48 | .000 |  |  |  |  |
| Extraversion | -.22 | .13 | -1.69 | .094 |  |  |  |  |
| Nonjudging | -.46 | .08 | -6.10 | .000 |  |  |  |  |
| Extraversion × Nonjudging | -.03 | .02 | -1.48 | .141 | .007 | .007 |  |  |
| Wisdom | -.35 | .11 | -3.20 | .002 |  |  |  |  |
| Extraversion × Wisdom | .07 | .04 | 191 | .058 | .015 | .015 |  |  |
| Both Moderators |  | F = 2.09 |  | .127 | .016 | .016 |  |  |
| Dependent variable | ***R*** | ***R2*** | ***MSE*** | ***F (HC0)*** | ***df1*** | ***df2*** | ***p*** | ***f2*** |
| High arousal | .57 | .33 | 35.96 | 14.83 | 5 | 133 | .000 | .49 |
|  | ***B*** | ***SE B (HC0)*** | ***t*** | ***p*** | ***ΔR2*** | ***Var f2*** |  |  |
| Constant | 17.77 | .50 | 35.53 | .000 |  |  |  |  |
| Extraversion | -.41 | .15 | -2.69 | .008 |  |  |  |  |
| Nonjudging | -.44 | .11 | -4.01 | .000 |  |  |  |  |
| Extraversion × Nonjudging | -.02 | .04 | -.66 | .51 | .003 | .003 |  |  |
| Wisdom | -.40 | .12 | -3.37 | .001 |  |  |  |  |
| Extraversion × Wisdom | .004 | .05 | .088 | .930 | .003 | .003 |  |  |
| Both Moderators |  | F = .28 |  | .757 | .003 | .003 |  |  |
| Dependent variable | ***R*** | ***R2*** | ***MSE*** | ***F (HC0)*** | ***df1*** | ***df2*** | ***p*** | ***f2*** |
| Low arousal | .61 | .37 | 50.75 | 20.92 | 5 | 133 | .000 | .59 |
|  | ***B*** | ***SE B (HC0)*** | ***t*** | ***p*** | ***ΔR2*** | ***Var f2*** |  |  |
| Constant | 17.18 | .61 | 28.01 | .000 |  |  |  |  |
| Extraversion | -.85 | .19 | -4.43 | .000 |  |  |  |  |
| Nonjudging | -.49 | .12 | -3.95 | .000 |  |  |  |  |
| Extraversion × Nonjudging | -.01 | .04 | -.24 | .811 | .000 | .000 |  |  |
| Wisdom | -.47 | .15 | -3.18 | .002 |  |  |  |  |
| Extraversion × Wisdom | -.02 | .06 | -.30 | .762 | .000 | .000 |  |  |
| Both Moderators |  | F = .17 |  | .845 | .001 | .001 |  |  |
| Dependent variable | ***R*** | ***R2*** | ***MSE*** | ***F (HC0)*** | ***df1*** | ***df2*** | ***p*** | ***f2*** |
| Time perception | .36 | .13 | 39.88 | 4.74 | 5 | 133 | .000 | .15 |
|  | ***B*** | ***SE B (HC0)*** | ***t*** | ***p*** | ***ΔR2*** | ***Var f2*** |  |  |
| Constant | 12.78 | 55 | 23.22 | .000 |  |  |  |  |
| Extraversion | -.3 | .16 | -1.95 | .053 |  |  |  |  |
| Nonjudging | -.30 | .103 | -2.89 | .005 |  |  |  |  |
| Extraversion × Nonjudging | .01 | 03 | .39 | .680 | .001 | .001 |  |  |
| Wisdom | .03 | .14 | .19 | .649 |  |  |  |  |
| Extraversion × Wisdom | .05 | .04 | 1.18 | .239 | .007 | .007 |  |  |
| Both Moderators |  | F = 1.04 |  | .358 | .011 | .011 |  |  |
| Dependent variable | ***R*** | ***R2*** | ***MSE*** | ***F (HC0)*** | ***df1*** | ***df2*** | ***p*** | ***f2*** |
| Boredom | .62 | .38 | 872.02 | 24.31 | 5 | 133 | .000 | .61 |
|  | ***B*** | ***SE B (HC0)*** | ***t*** | ***p*** | ***ΔR2*** | ***Var f2*** |  |  |
| Constant | 100.61 | 2.46 | 40.93 | .000 |  |  |  |  |
| Extraversion | -2.49 | .74 | -3.38 | .000 |  |  |  |  |
| Nonjudging | -2.51 | .51 | -4.88 | .000 |  |  |  |  |
| Extraversion × Nonjudging | -.14 | .15 | -.97 | .336 | .004 | .004 |  |  |
| Wisdom | -1.86 | .61 | -3.05 | .003 |  |  |  |  |
| Extraversion × Wisdom | .16 | .20 | .78 | .436 | .002 | .002 |  |  |
| Both Moderators |  | F = .55 |  | .580 | .004 | .004 |  |  |

Table S14. Main and interaction effects between nonreactivity and extraversion as well as between wisdom and extraversion in predicting boredom and its dimensions.

| Dependent variable | *R* | *R2* | *MSE* | *F (HC0)* | *df1* | *df2* | *p* | *f2* |
| --- | --- | --- | --- | --- | --- | --- | --- | --- |
| Disengagement | .42 | .18 | 166.67 | 9.39 | 5 | 133 | .000 | .22 |
|  | ***B*** | ***SE B (HC0)*** | ***t*** | ***p*** | ***ΔR2*** | ***Var f2*** |  |  |
| Constant | 37.9 | 1.08 | 35.11 | .000 |  |  |  |  |
| Extraversion | -.88 | .33 | -2.67 | .009 |  |  |  |  |
| Nonreactivity | -.45 | .40 | -1.14 | .258 |  |  |  |  |
| Extraversion × Nonreactivity | .005 | .12 | .04 | .97 | .000 | .000 |  |  |
| Wisdom | -.87 | .29 | -2.98 | .003 |  |  |  |  |
| Extraversion × Wisdom | .02 | .09 | .18 | .856 | .000 | .000 |  |  |
| Both Moderators |  | F=.02 |  | .988 | .000 | .000 |  |  |
| Dependent variable | ***R*** | ***R2*** | ***MSE*** | ***F (HC0)*** | ***df1*** | ***df2*** | ***p*** | ***f2*** |
| Inattention | .49 | .24 | 31.17 | 12.0 | 5 | 133 | .000 | .32 |
|  | ***B*** | ***SE B (HC0)*** | ***t*** | ***p*** | ***ΔR2*** | ***Var f2*** |  |  |
| Constant | 14.68 | .47 | 31.46 | .000 |  |  |  |  |
| Extraversion | -.31 | .14 | -2.17 | .032 |  |  |  |  |
| Nonreactivity | -.21 | .17 | -1.23 | .221 |  |  |  |  |
| Extraversion × Nonreactivity | .04 | .05 | .78 | .44 | .003 | .003 |  |  |
| Wisdom | -.48 | .13 | -3.86 | .000 |  |  |  |  |
| Extraversion × Wisdom | .05 | .04 | 1.33 | .185 | .007 | .007 |  |  |
| Both Moderators |  | F = 1.71 |  | .185 | .02 | .02 |  |  |
| Dependent variable | ***R*** | ***R2*** | ***MSE*** | ***F (HC0)*** | ***df1*** | ***df2*** | ***p*** | ***f2*** |
| High arousal | .47 | .22 | 41.44 | 12.10 | 5 | 133 | .000 | .28 |
|  | ***B*** | ***SE B (HC0)*** | ***t*** | ***p*** | ***ΔR2*** | ***Var f2*** |  |  |
| Constant | 17.68 | .54 | 32.56 | .000 |  |  |  |  |
| Extraversion | -.48 | .16 | -2.96 | .004 |  |  |  |  |
| Nonreactivity | -.13 | .21 | -.64 | .524 |  |  |  |  |
| Extraversion × Nonreactivity | .07 | .06 | 1.18 | .241 | .008 | .008 |  |  |
| Wisdom | -.56 | .13 | -4.17 | .000 |  |  |  |  |
| Extraversion × Wisdom | -.02 | .04 | -.48 | .63 | .001 | .001 |  |  |
| Both Moderators |  | F = .70 |  | .501 | .008 | .008 |  |  |
| Dependent variable | ***R*** | ***R2*** | ***MSE*** | ***F (HC0)*** | ***df1*** | ***df2*** | ***p*** | ***f2*** |
| Low arousal | .54 | .29 | 57.31 | 15.17 | 5 | 133 | .000 | .41 |
|  | ***B*** | ***SE B (HC0)*** | ***t*** | ***p*** | ***ΔR2*** | ***Var f2*** |  |  |
| Constant | 17.12 | .65 | 26.45 | .000 |  |  |  |  |
| Extraversion | -.93 | .19 | -4.89 | .000 |  |  |  |  |
| Nonreactivity | -.27 | .22 | -1.20 | .231 |  |  |  |  |
| Extraversion × Nonreactivity | .06 | .07 | .84 | .404 | .003 | .003 |  |  |
| Wisdom | -.60 | .16 | -3.83 | .002 |  |  |  |  |
| Extraversion × Wisdom | -.03 | .05 | -.56 | .578 | .001 | .001 |  |  |
| Both Moderators |  | F = .37 |  | .690 | .003 | .003 |  |  |
| Dependent variable | ***R*** | ***R2*** | ***MSE*** | ***F (HC0)*** | ***df1*** | ***df2*** | ***p*** | ***f2*** |
| Time perception | .28 | .08 | 42.10 | 3.28 | 5 | 133 | .008 | .08 |
|  | ***B*** | ***SE B (HC0)*** | ***t*** | ***p*** | ***ΔR2*** | ***Var f2*** |  |  |
| Constant | 12.77 | .55 | 23.36 | .000 |  |  |  |  |
| Extraversion | -.35 | .15 | -2.25 | .026 |  |  |  |  |
| Nonreactivity | -.24 | .18 | -1.34 | .184 |  |  |  |  |
| Extraversion × Nonreactivity | .05 | .06 | .82 | .412 | .004 | .004 |  |  |
| Wisdom | -.03 | .15 | -.20 | .844 |  |  |  |  |
| Extraversion × Wisdom | .05 | .04 | 1.20 | .233 | .007 | .007 |  |  |
| Both Moderators |  | F = 1.60 |  | .205 | .02 | .02 |  |  |
| Dependent variable | ***R*** | ***R2*** | ***MSE*** | ***F (HC0)*** | ***df1*** | ***df2*** | ***p*** | ***f2*** |
| Boredom | .50 | .25 | 1048.1 | 15.29 | 5 | 133 | .000 | .33 |
|  | ***B*** | ***SE B (HC0)*** | ***t*** | ***p*** | ***ΔR2*** | ***Var f2*** |  |  |
| Constant | 100.17 | 2.70 | 37.12 | .000 |  |  |  |  |
| Extraversion | -2.94 | .79 | -3.74 | .000 |  |  |  |  |
| Nonreactivity | -1.31 | 1.02 | -1.28 | .202 |  |  |  |  |
| Extraversion × Nonreactivity | .22 | .30 | .74 | .461 | .003 | .003 |  |  |
| Wisdom | -2.55 | .69 | -369 | .000 |  |  |  |  |
| Extraversion × Wisdom | .07 | .20 | .33 | .743 | .000 | .000 |  |  |
| Both Moderators |  | F = .46 |  | .633 | .005 | .005 |  |  |

Table ?. Main and interaction effects between the describing and extraversion in predicting boredom.

| Dependent variable | *R* | *R2* | *MSE* | *F (HC0)* | *df1* | *df2* | *f2* | *p* |
| --- | --- | --- | --- | --- | --- | --- | --- | --- |
| Boredom | 0.47 | 0.22 | 1082.91 | 13.08 | 3 | 135 | 0.28 | 0.000 |
| ***B*** | ***SE B (HC0)*** | ***t*** | ***p*** | ***ΔR2*** | ***Var f2*** |  |  |
| Constant | 102.38 | 2.94 | 34.84 | 0.000 |  |  |  |  |
| Extraversion | -2.10 | 0.89 | -2.36 | 0.020 |  |  |  |  |
| Describing | -2.54 | 0.60 | -4.25 | 0.000 |  |  |  |  |
| Extraversion × Describing | -0.21 | 0.12 | -1.77 | 0.088 | 0.011 | 0.011 |  |  |

Table?. Main and interaction effects between the describing and extraversion in predicting inattention.

| Dependent variable | *R* | *R2* | *MSE* | *F (HC0)* | *df1* | *df2* | *f2* | *p* |
| --- | --- | --- | --- | --- | --- | --- | --- | --- |
| Inattention | 0.51 | 0.26 | 30.06 | 18.93 | 3 | 135 | 0.35 | 0.000 |
| ***B*** | ***SE B (HC0)*** | ***t*** | ***p*** | ***ΔR2*** | ***Var f2*** |  |  |
| Constant | 15.19 | 0.49 | 30.97 | 0.000 |  |  |  |  |
| Extraversion | -0.06 | 0.16 | -0.37 | 0.714 |  |  |  |  |
| Describing | -0.60 | 0.90 | -6.68 | 0.000 |  |  |  |  |
| Extraversion × Describing | -0.04 | 0.02 | -1.82 | 0.07 | 0.013 | 0.013 |  |  |

Table ?. Main and interaction effects between mindfulness and extraversion as well as between wisdom and extraversion in predicting inattention.

| Dependent variable | *R* | *R2* | *MSE* | *F (HC0)* | *df1* | *df2* | *p* | *f2* |
| --- | --- | --- | --- | --- | --- | --- | --- | --- |
| Inattention | 0.72 | 0.51 | 20.08 | 45.26 | 5 | 133 | 0.000 | 1.04 |
| ***B*** | ***SE B (HC0)*** | ***t*** | ***p*** | ***ΔR2*** | ***Var f2*** |  |  |
| Constant | 14.94 | 0.39 | 38.44 | 0.000 |  |  |  |  |
| Extraversion | 0.03 | 0.13 | 0.22 | 0.83 |  |  |  |  |
| Mindfulness | -0.26 | 0.03 | -9.58 | 0.000 |  |  |  |  |
| Extraversion × Mindfulness | -0.02 | 0.01 | -1.98 | 0.049 | 0.011 | 0.011 |  |  |
| Wisdom | -0.07 | 0.11 | -0.61 | 0.543 |  |  |  |  |
| Extraversion × Wisdom | 0.08 | 0.04 | 2.06 | 0.043 | 0.018 | 0.018 |  |  |
| Both Moderators | F = 2.63 | | | 0.076 | 0.02 | 0.02 |  |  |

Table ?. Main and interaction effects between describing and extraversion as well as between wisdom and extraversion in predicting boredom.

| Dependent variable | *R* | *R2* | *MSE* | *F (HC0)* | *df1* | *df2* | *p* | *f2* |
| --- | --- | --- | --- | --- | --- | --- | --- | --- |
| Boredom | 0.55 | 0.30 | 986.19 | 17.21 | 5 | 133 | 0.000 | 0.33 |
| ***B*** | ***SE B (HC0)*** | ***t*** | ***p*** | ***ΔR2*** | ***Var f2*** |  |  |
| Constant | 101.79 | 2.80 | 36.40 | 0.000 |  |  |  |  |
| Extraversion | -1.73 | 0.85 | -2.03 | 0.044 |  |  |  |  |
| Describing | -1.98 | 0.54 | -3.66 | 0.000 |  |  |  |  |
| Extraversion × Describing | -0.25 | 0.12 | -2.09 | 0.038 | 0.014 | 0.014 |  |  |
| Wisdom | -2.40 | 0.62 | -3.88 | 0.000 |  |  |  |  |
| Extraversion × Wisdom | 0.30 | 0.20 | 1.46 | 0.15 | 0.01 | 0.01 |  |  |
| Both Moderators | F=2.60 | | | 0.078 | 0.016 | 0.019 |  |  |

Table?. Main and interaction effects between describing and extraversion as well as between wisdom and extraversion in predicting disengagement.

| Dependent variable | *R* | *R2* | *MSE* | *F (HC0)* | *df1* | *df2* | *p* | *f2* |
| --- | --- | --- | --- | --- | --- | --- | --- | --- |
| Disengagement | 0.47 | 0.22 | 157.52 | 11.52 | 5 | 133 | 0.000 | 0.28 |
| ***B*** | ***SE B (HC0)*** | ***t*** | ***p*** | ***ΔR2*** | ***Var f2*** |  |  |
| Constant | 38.60 | 1.13 | 34.02 | 0.000 |  |  |  |  |
| Extraversion | -0.46 | 0.36 | -1.28 | 0.20 |  |  |  |  |
| Describing | -0.70 | 0.23 | -3.06 | 0.003 |  |  |  |  |
| Extraversion × Describing | -0.10 | 0.05 | -2.13 | 0.035 | 0.017 | 0.017 |  |  |
| Wisdom | -0.81 | 0.05 | -3.04 | 0.003 |  |  |  |  |
| Extraversion × Wisdom | 0.08 | 0.09 | 0.93 | 0.354 | 0.01 | 0.01 |  |  |
| Both Moderators | F=2.29 | | | 0.10 | 0.018 | 0.018 |  |  |

Table ?. Main and interaction effects between describing and extraversion as well as between wisdom and extraversion in predicting time perception.

| Dependent variable | *R* | *R2* | *MSE* | *F (HC0)* | *df1* | *df2* | *p* | *f2* |
| --- | --- | --- | --- | --- | --- | --- | --- | --- |
| Time Perception | 0.28 | 0.08 | 42.31 | 2.55 | 5 | 133 | 0.031 | 0.28 |
| ***B*** | ***SE B (HC0)*** | ***t*** | ***p*** | ***ΔR2*** | ***Var f2*** |  |  |
| Constant | 13.06 | 0.60 | 21.75 | 0.000 |  |  |  |  |
| Extraversion | -0.36 | 0.19 | -1.94 | 0.054 |  |  |  |  |
| Describing | -0.05 | 0.11 | -0.50 | 0.616 |  |  |  |  |
| Extraversion × Describing | -0.04 | 0.02 | -1.90 | 0.059 | 0.012 | 0.012 |  |  |
| Wisdom | -0.11 | 0.14 | -0.77 | 0.44 |  |  |  |  |
| Extraversion × Wisdom | 0.09 | 0.04 | 2.03 | 0.044 | 0.023 | 0.024 |  |  |
| Both Moderators | F=3.04 | | | 0.051 | 0.026 | 0.027 |  |  |
